# Supplementary material for: An approach to estimating the environmental burden of cancer from known and probable carcinogens: application to Ontario, Canada
Source: PubMed Central journal article supplement (PMC7320572; doi:10.1186/s12889-020-08771-w), 2020-06-26
Supplement: 12889_2020_8771_MOESM1_ESM.pdf [file 12889_2020_8771_MOESM1_ESM.pdf]

# Additional File 1. Carcinogen Selection and Cancer Types

---

Environmental carcinogen selection was based on a comprehensive framework previously developed for occupational carcinogens in Europe (Kauppinen et al. 2000), and later adapted for environmental carcinogens in Canada (Setton et al. 2013). Both frameworks are themselves based on International Agency for Research on Cancer (IARC) classifications. IARC classifies agents on the basis of carcinogenicity after examining evidence related to human and animal carcinogenicity. IARC deems:

- Group 1 agents as “carcinogenic to humans” based on finding sufficient evidence in humans to establish causal relationships between the exposure and development of cancer,
- Group 2A agents as “probably carcinogenic to humans” on the basis of limited evidence in humans, but sufficient evidence in animals, and
- Group 2B agents as “possibly carcinogenic to humans” on the basis of limited evidence in humans and insufficient evidence in animals.

Setton et al. (2013) focused on Group 1, Group 2A and Group 2B environmental carcinogens present in outdoor air, indoor air, indoor dust, drinking water, and foods and beverages (they did not include dermal absorption exposures because of a lack of data). We followed their approach, but excluded Group 2B carcinogens because we did not feel comfortable providing attributable cancer estimates for agents with limited or insufficient carcinogenicity evidence in animals or humans, given all the other assumptions that must be made in such an assessment.

Specifically, to select the environmental carcinogens:

- First, we consulted IARC on March 10, 2015 to obtain the listing of 188 agents they classified as “carcinogenic to humans” (i.e., Group 1) or “probably carcinogenic to humans” (i.e., Group 2A) (International Agency for Research on Cancer, 2015).
- Second, we focused on the 52 Group 1 and 2A carcinogens where we deemed the exposure category to be “environmental” (excluding 136 carcinogens from other exposure categories, related to items like occupation, behavior, or diet; see Table 1 and below for these excluded exposure categories and carcinogens).
- Third, we then grouped some related carcinogens together (e.g., different wavelengths of UV radiation; see Table 2 for the groupings), reducing the number of carcinogens to 38.
- Fourth, we determined that the average Ontarian would be unlikely to be exposed to 14 carcinogens during normal daily activities, leaving 24 carcinogens.
- Fifth, we deemed there to be insufficient data to classify exposure to the general public to one carcinogen (silica). Ultimately, we included the 23 carcinogens most relevant to the Ontario population in our assessment.

Table 2 provides a listing of the 52 environmental carcinogens and how the final list of 23 carcinogens included in the analysis was reached.

**Table 1. Number and percentage of IARC Group 1 and 2A carcinogens by exposure category**

| Exposure Category      | <i>Group 1</i> |             | <i>Group 2A</i> |             | <i>Total</i> |             |
|------------------------|----------------|-------------|-----------------|-------------|--------------|-------------|
|                        | <i>n</i>       | <i>%</i>    | <i>n</i>        | <i>%</i>    | <i>n</i>     | <i>%</i>    |
| Behavioural            | 2              | 1.7         | 0               | 0           | 2            | 1.1         |
| Dietary Agents         | 8              | 6.8         | 3               | 4.3         | 11           | 5.9         |
| Environmental          | 32             | 27.1        | 20              | 28.6        | 52           | 27.7        |
| Hormones               | 6              | 5.1         | 1               | 1.4         | 7            | 3.7         |
| Microbiological Agents | 12             | 10.2        | 3               | 4.3         | 15           | 8.0         |
| Occupational           | 29             | 24.6        | 27              | 38.6        | 56           | 29.8        |
| Pharmacologic Agents   | 22             | 18.6        | 16              | 22.9        | 38           | 20.2        |
| Radionuclides          | 7              | 5.9         | 0               | 0           | 7            | 3.7         |
| <b>Total</b>           | <b>118</b>     | <b>100%</b> | <b>70</b>       | <b>100%</b> | <b>188</b>   | <b>100%</b> |

Specific carcinogens in Table 1 are listed below.

**BEHAVIOURAL (n=2)**

1. Tobacco smoking
2. Ultraviolet-emitting tanning devices

**DIETARY AGENTS (n=11)**

1. Acetaldehyde associated with consumption of alcoholic beverages
2. Alcoholic beverages
3. Areca nut
4. Betel quid with tobacco
5. Betel quid without tobacco
6. N<sup>1</sup>-Nitrosoornicotine (NNN) and 4-(N-Nitrosomethylamino)-1-(3-pyridyl)-1-butanone (NNK)
7. Salted fish, Chinese-style
8. Tobacco, smokeless
9. IQ (2-Amino-3-methylimidazo[4,5-f]quinoline)
10. Mate, hot
11. Nitrate or nitrite (ingested) under conditions that result in endogenous nitrosation

**HORMONES (n=7)**

1. Diethylstilbestrol
2. Estrogen-only menopausal therapy
3. Estrogen therapy, postmenopausal (see Estrogen-only menopausal therapy)
4. Estrogen-progestogen menopausal therapy (combined)
5. Estrogen-progestogen oral contraceptives (combined)
6. Ethanol in alcoholic beverages
7. Androgenic (anabolic) steroids

**MICR BIOLOGICAL AGENTS (n=15)**

1. Aflatoxins

2. Clonorchis sinensis (infection with)
3. Epstein-Barr virus
4. Helicobacter pylori (infection with)
5. Hepatitis B virus (chronic infection with)
6. Hepatitis C virus (chronic infection with)
7. Human immunodeficiency virus type 1 (infection with)
8. Human papillomavirus types 16, 18, 31, 33, 35, 39, 45, 51, 52, 56, 58, 59
9. Human T-cell lymphotropic virus type I
10. Kaposi sarcoma herpesvirus
11. Opisthorchis viverrini (infection with)
12. Schistosoma haematobium (infection with)
13. Human papillomavirus type 68
14. Malaria (caused by infection with Plasmodium falciparum in holoendemic areas)
15. Merkel cell polyomavirus (MCV)

**RADIONUCLIDES (n=7)**

1. Fission products, including strontium-90
2. Neutron radiation
3. Phosphorus-32, as phosphate
4. Plutonium
5. Radioiodines, including iodine-131
6. Radionuclides, alpha-particle-emitting, internally deposited
7. Radionuclides, beta-particle-emitting, internally deposited

**PHARMACEUTICAL AGENTS (n=38)**

1. Aristolochic acid
2. Aristolochic acid, plants containing

3. Azathioprine
4. Busulfan
5. Chlorambucil
6. Chlornaphazine
7. Cyclophosphamide
8. Cyclosporine (see ciclosporin)
9. Etoposide
10. Etoposide in combination with cisplatin and bleomycin
11. Melphalan
12. Methoxsalen (8-methoxypsoralen) plus ultraviolet A radiation
13. Methyl-CCNU
14. MOPP and other combined chemotherapy including alkylating agents
15. Phenacetin
16. Phenacetin, analgesic mixtures containing
17. Semustine (see Methyl-CCNU)
18. Sulfur mustard
19. Tamoxifen
20. Thiotepa
21. Thorium-232 and its decay products
22. Treosulfan
23. Adriamycin
24. Azacitidine
25. Bischloroethyl nitrosourea (BCNU)
26. Chloramphenicol
27. 1-(2-Chloroethyl)-3-cyclohexyl-1-nitrosourea (CCNU)
28. Chlorozotocin
29. Cisplatin
30. 5-Methoxypsoralen
31. N-Methyl-N'-nitro-N-nitrosoguanidine (MNNG)
32. Nitrogen mustard
33. Procarbazine hydrochloride
34. Teniposide
35. Chloral
36. Chloral hydrate
37. N-Methyl-N-nitrosourea
38. Pioglitazone

**OCCUPATIONAL (n=56)***Group 1*

1. Acheson process, occupational exposure associated with
2. Acid mists, strong inorganic
3. Aluminium production
4. 4-Aminobiphenyl
5. Auramine production
6. Benzidine
7. Benzidine, dyes metabolized to
8. Bis(chloromethyl)ether; chloromethyl methyl ether (technical-grade)
9. Coal gasification
10. Coal-tar distillation
11. Coal-tar pitch
12. Coke production
13. Erionite
14. Ethylene oxide
15. Fluoro-edenite fibrous amphibole
16. Haematite mining (underground)
17. Iron and steel founding (occupational exposure during)
18. Isopropyl alcohol manufacture using strong acids
19. Leather dust
20. Magenta production
21. 4,4'-Methylenebis(2-chloroaniline) (MOCA)
22. Mineral oils, untreated or mildly treated
23. 2-Naphthylamine
24. Painter (occupational exposure as a)
25. 2,3,4,7,8-Pentachlorodibenzofuran
26. Rubber manufacturing industry
27. Shale oils
28. Soot (as found in occupational exposure of chimney sweeps)
29. ortho-Toluidine
43. Silicon carbide whiskers
44. Vinyl bromide
45. Vinyl fluoride
46. Glycidol
47. Methyl methanesulfonate
48. 6-Nitrochrysene
49. N-Nitrosodiethylamine
50. N-Nitrosodimethylamine
51. 2-Nitrotoluene
52. Non-arsenical insecticides (occupational exposures in spraying and application of)
53. 1,3-Propane sultone
54. Tetrafluoroethylene (TFE)
55. 1,2,3-Trichloropropane
56. Tris(2,3-dibromopropyl) phosphate

*Group 2A*

30. Art glass, glass containers and pressed ware (manufacture of)
31. Carbon electrode manufacture
32. 4-Chloro-ortho-toluidine
33. Cobalt metal with tungsten carbide
34. Diethyl sulfate
35. Dimethylcarbamoyl chloride
36. 1,2-Dimethylhydrazine
37. Dimethyl sulfate
38. N-Ethyl-N-nitrosourea (ENU)
39. Hairdresser or barber (occupational exposure as a)
40. Indium phosphide
41. Petroleum refining (occupational exposures in)
42. Shiftwork that involves circadian disruption

**Table 2. Listing of IARC Group 1 and 2A carcinogens for the environmental exposure category (n=52), as well as whether the carcinogen appears in the report's final list or the reason for exclusion**

| IARC Agent                                                                                                                | IARC Group | Report final list (or reason for exclusion) |
|---------------------------------------------------------------------------------------------------------------------------|------------|---------------------------------------------|
| Outdoor air pollution, particulate matter in                                                                              | 1          |                                             |
| Outdoor air pollution                                                                                                     | 1          |                                             |
| Biomass fuel, indoor emissions from household combustion of                                                               | 2A         | PM <sub>2.5</sub>                           |
| Radon-222 and its decay products                                                                                          | 1          |                                             |
| Radium-224 and its decay products                                                                                         | 1          |                                             |
| Radium-226 and its decay products                                                                                         | 1          | Radon                                       |
| Radium-228 and its decay products                                                                                         | 1          |                                             |
| Benzo[ <i>a</i> ]pyrene                                                                                                   | 1          |                                             |
| Cyclopenta[ <i>cd</i> ]pyrene                                                                                             | 2A         |                                             |
| Dibenz[ <i>a,j</i> ]acridine                                                                                              | 2A         | PAH                                         |
| Dibenz[ <i>a,h</i> ]anthracene                                                                                            | 2A         |                                             |
| Dibenzo[ <i>a,l</i> ]pyrene                                                                                               | 2A         |                                             |
| Polychlorinated biphenyls                                                                                                 | 1          |                                             |
| 3,4,5,3',4'-Pentachlorobiphenyl (PCB-126)                                                                                 | 1          |                                             |
| Polychlorinated biphenyls, dioxin-like, with a Toxicity Equivalency Factor (TEF) according to WHO                         | 1          | PCB                                         |
| Engine exhaust, diesel                                                                                                    | 1          |                                             |
| 1-Nitropyrene                                                                                                             | 2A         | DEE                                         |
| Solar radiation                                                                                                           | 1          |                                             |
| Ultraviolet radiation                                                                                                     | 1          | UV                                          |
| Ionizing radiation (all types)                                                                                            | 1          |                                             |
| X- and Gamma-Radiation                                                                                                    | 1          | <i>Excluded (see note A)</i>                |
| 2,3,7,8-Tetrachlorodibenzo- <i>para</i> -dioxin                                                                           | 1          | Dioxin                                      |
| Arsenic and inorganic arsenic compounds                                                                                   | 1          | Arsenic                                     |
| Asbestos                                                                                                                  | 1          | Asbestos                                    |
| Benzene                                                                                                                   | 1          | Benzene                                     |
| 1,3-Butadiene                                                                                                             | 1          | 1,3-Butadiene                               |
| Cadmium and cadmium compounds                                                                                             | 1          | Cadmium                                     |
| Chromium (VI) compounds                                                                                                   | 1          | Chromium                                    |
| Formaldehyde                                                                                                              | 1          | Formaldehyde                                |
| 1,2-Dichloropropane                                                                                                       | 1          | Dichloropropane                             |
| Nickel compounds                                                                                                          | 1          | Nickel                                      |
| Tobacco smoke, second-hand                                                                                                | 1          | SHS                                         |
| Trichloroethylene                                                                                                         | 1          | TCE                                         |
| Vinyl chloride                                                                                                            | 1          | VC                                          |
| Acrylamide                                                                                                                | 2A         | Acylamide                                   |
| alpha-Chlorinated toluenes (benzal chloride, benzotrichloride, benzyl chloride) and benzoyl chloride (combined exposures) | 2A         | Chlorinated Toluenes                        |
| Tetrachloroethylene (Perchloroethylene)                                                                                   | 2A         | PCE                                         |

| IARC Agent                                                                              | IARC Group | Report final list (or reason for exclusion) |
|-----------------------------------------------------------------------------------------|------------|---------------------------------------------|
| Dichloromethane (Methylene chloride)                                                    | 2A         | DCM                                         |
| Coal, indoor emissions from household combustion of                                     | 1          | <i>Excluded (see note B)</i>                |
| Beryllium and beryllium compounds                                                       | 1          | <i>Excluded (see note B)</i>                |
| Wood dust                                                                               | 1          | <i>Excluded (see note B)</i>                |
| Silica dust, crystalline, in the form of quartz or cristobalite                         | 1          | <i>Excluded (see note C)</i>                |
| Ethyl carbamate (Urethane)                                                              | 2A         | <i>Excluded (see note B)</i>                |
| Bitumens, occupational exposure to oxidized bitumens and their emissions during roofing | 2A         | <i>Excluded (see note B)</i>                |
| Captafol                                                                                | 2A         | <i>Excluded (see note B)</i>                |
| Creosotes                                                                               | 2A         | <i>Excluded (see note B)</i>                |
| Epichlorohydrin                                                                         | 2A         | <i>Excluded (see note B)</i>                |
| Lead compounds, inorganic                                                               | 2A         | <i>Excluded (see note D)</i>                |
| Polybrominated biphenyls                                                                | 2A         | <i>Excluded (see note B)</i>                |
| Styrene-7,8-oxide                                                                       | 2A         | <i>Excluded (see note E)</i>                |
| Frying, emissions from high-temperature                                                 | 2A         | <i>Excluded (see note B)</i>                |
| Ethylene dibromide                                                                      | 2A         | <i>Excluded (see note B)</i>                |

Notes:

- A. Excluded because difficult to assess exposure and solar and ultraviolet radiation has a bigger impact than ionizing radiation.
- B. Not relevant for general population environmental exposure in Ontario
- C. Insufficient data to assess general population exposure in Ontario
- D. Excluded because exposure to inorganic lead in the general Ontario population is unlikely and there is no way to estimate this given available exposure data sources. (We do not include general lead exposure since that is classified by IARC as Group 2B.)
- E. Excluded because general population is exposed to styrene (which is IARC Group 2B) not this short-lived metabolite.

# Cancer types/sites associated with exposure to carcinogens

IARC provides information on the cancer type or cancer site associated with an agent having limited or sufficient evidence of causing cancer in humans (summarized in Table 3). Lung is a common cancer site, associated (limited or sufficient evidence) with exposure to over half of the carcinogens included in our work. Other common cancer sites/types were liver (associated with five carcinogens), bladder (associated with four carcinogens), and leukaemias (associated with three carcinogens).

**Table 3. Summary of environmental carcinogens and associated cancer sites for which there is sufficient or limited evidence of cancer risk in humans, as classified by the International Agency for Research on Cancer (IARC)**

| Environmental carcinogen                                | Cancer site(s)                                                  |                                                 |
|---------------------------------------------------------|-----------------------------------------------------------------|-------------------------------------------------|
|                                                         | Sufficient evidence                                             | Limited evidence                                |
| <i>alpha</i> -Chlorinated toluenes and benzoyl chloride |                                                                 | Lung                                            |
| Arsenic                                                 | Lung, urinary bladder, skin (primarily squamous cell carcinoma) | Liver, prostate, kidney                         |
| Asbestos                                                | Larynx, lung, mesothelioma, ovary                               | Pharynx, stomach, colon and rectum              |
| Benzene                                                 | Acute myeloid leukaemia, acute non-lymphocytic leukaemia        | Other leukaemias and lymphomas                  |
| 1,3-Butadiene                                           | Haematolymphatic organs                                         |                                                 |
| Cadmium                                                 | Lung                                                            | Prostate                                        |
| Chromium (VI)                                           | Lung                                                            | Nasal cavity and paranasal sinus                |
| Dichloromethane                                         |                                                                 | Liver, non-Hodgkin lymphoma                     |
| 1,2-Dichloropropane                                     | Liver (cholangiocarcinoma)                                      |                                                 |
| Diesel engine exhaust                                   | Lung                                                            | Urinary bladder                                 |
| Formaldehyde                                            | Nasopharynx, leukemia                                           | Nasal cavity and paranasal sinus                |
| Nickel                                                  | Nasal cavity and paranasal sinus, lung                          |                                                 |
| Outdoor air pollution                                   | Lung                                                            | Urinary bladder (soot)                          |
| Polychlorinated biphenyls                               | Melanoma                                                        | Breast, non-Hodgkin lymphoma                    |
| Radon and other alpha-particle emitters                 | Lung                                                            | Leukaemia                                       |
| 2,3,7,8-Tetrachlorodibenzo-para-dioxin                  | All sites (combined)                                            | Lung, soft-tissue sarcoma, non-Hodgkin lymphoma |
| Tetrachloroethylene                                     |                                                                 | Urinary bladder                                 |
| Tobacco smoke, second-hand                              | Lung                                                            | Pharynx, larynx                                 |
| Trichloroethylene                                       | Kidney                                                          | Liver, non-Hodgkin lymphoma                     |
| Solar ultraviolet radiation                             | Skin (melanoma, squamous cell carcinoma, basal cell carcinoma)  | Lip, eye                                        |
| Vinyl chloride                                          | Liver (angiosarcoma and hepatocellular carcinoma)               |                                                 |

Note: IARC did not provide any human cancer site/type information for acrylamide or PAHs (either individual PAHs, such as benzo[a]pyrene, or as a group) due to inadequate evidence from studies of cancer in humans. (These agents are classified as carcinogenic to humans because of strong mechanistic evidence in exposure humans.)

## References

International Agency for Research on Cancer. IARC monographs on the evaluation of carcinogenic risks to humans. List of classifications, Volumes 1:109. 2015. Available here: <https://monographs.iarc.fr/list-of-classifications> (accessed March 2015)

Kauppinen T, Toikkanen J, Pedersen D, Young R, Ahrens W, Boffetta P, Hansen J, Kromhout H, Blasco JM, Mirabelli D, de la Orden-Rivera V. Occupational exposure to carcinogens in the European Union. Occupational and environmental medicine. 2000 Jan 1;57(1):10-8.

Setton E, Hystad P, Poplawski K, Cheasley R, Cervantes-Larios A, Keller CP, Demers PA. Risk-based indicators of Canadians' exposures to environmental carcinogens. Environmental Health. 2013 Dec;12(1):15.
